# Supplementary material for: Water modulates the ultraslow dynamics of hydrated ionic liquids near CG rich DNA: consequences for DNA stability
Source: Royal Society of Chemistry journal article supplement (doi:10.1039/c6cp05959g), 2016-01-01
Supplement: c6cp05959g1.pdf [file c6cp05959g1.pdf]

Supporting information for

## Water modulates the ultraslow dynamics of hydrated ionic liquids near CG rich DNA: consequence to DNA stability

Debasis Saha\*, Mandar Kulkarni and Arnab Mukherjee\*

Department of chemistry, Indian Institute of Science Education and Research Pune - 411008,  
Maharashtra, India

### Cations considered in the study

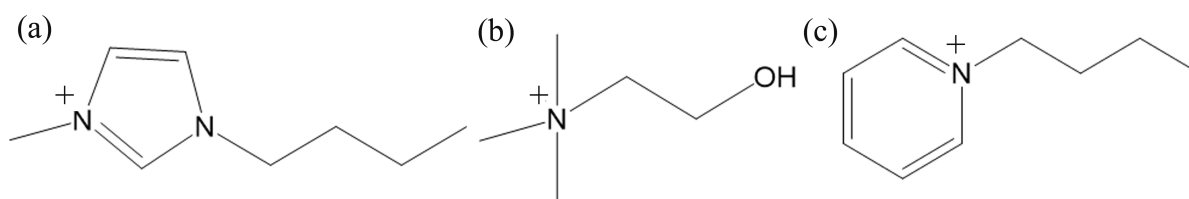

**Figure S1.** (a) 1-butyl-3-methylimidazolium cation ( $[BMIM]^+$ ), (b) choline cation and (c) 1-butylpyridinium cation ( $[BPYR]^+$ ).

### Scheme for stable state picture approach

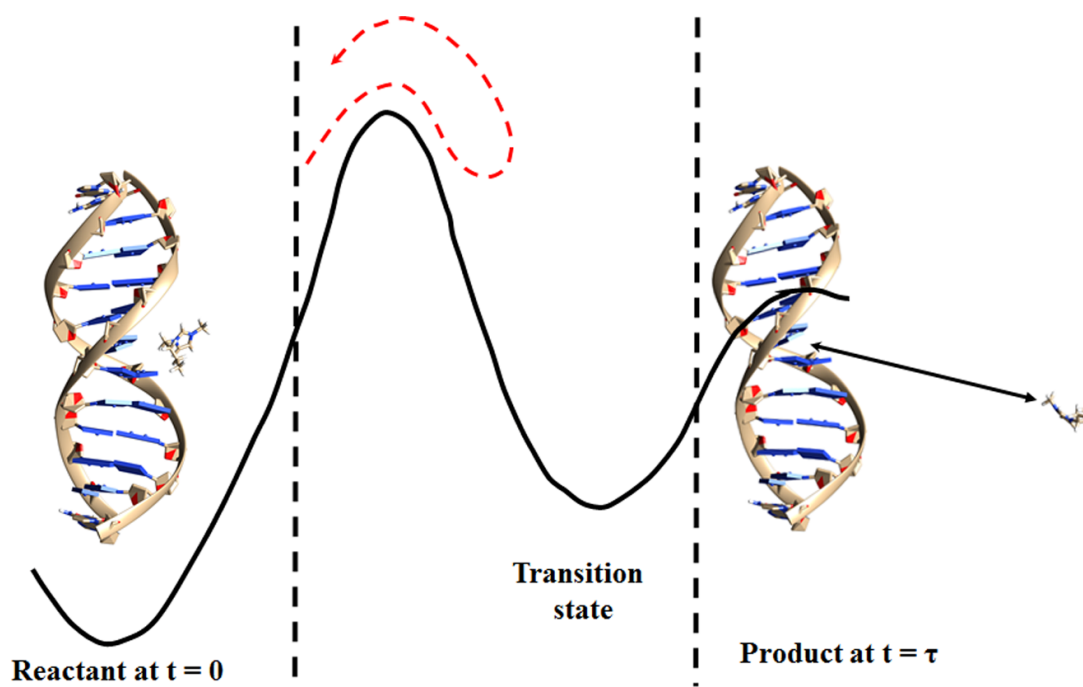

**Figure S2.** Schematic of the SSP approach involved in the calculation of MRTs. Vertical dashed lines are the stable state boundaries; the left of the left line is considered to be reactant state when a solvent molecule is close to a particular site. The right of the right side line indicates the product state when the solvent is away from the DNA.

### RDF and PMF plots for minor groove and phosphate atoms

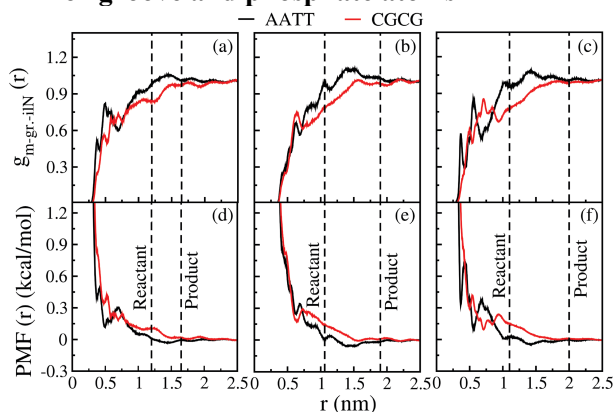

**Figure S3.** The RDF (top panel) and PMF (bottom panel) plots for minor groove atoms of the DNAs with [BMIM]<sup>+</sup> (a and d), [choline]<sup>+</sup> (b and e) and [BPYR]<sup>+</sup> (c and f) respectively.

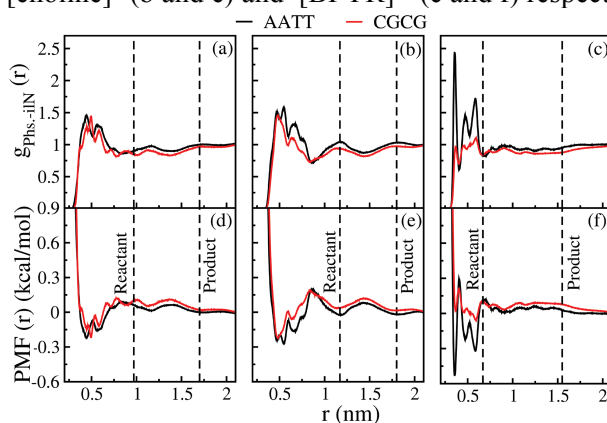

**Figure S4.** The RDF (top panel) and PMF (bottom panel) plots for phosphate atoms of the DNAs with [BMIM]<sup>+</sup> (a and d), [choline]<sup>+</sup> (b and e) and [BPYR]<sup>+</sup> (c and f) respectively.

**Table S1.** The distance cut-off taken for calculation of MRTs of IL cations.

| IL solution                                                      | Reactant state cut-off (nm) |       |           | Product state cut-off (nm) |       |           |
|------------------------------------------------------------------|-----------------------------|-------|-----------|----------------------------|-------|-----------|
|                                                                  | Major                       | Minor | Phosphate | Major                      | Minor | Phosphate |
| [BMIM][Cl]                                                       | 1.32                        | 1.20  | 0.97      | 2                          | 1.65  | 1.7       |
| [Choline][Cl]                                                    | 1.20                        | 1.06  | 1.17      | 2.05                       | 1.9   | 1.8       |
| [BPYR][Cl]/<br>[BPYR][PF <sub>6</sub> ]/[BPYR][BF <sub>4</sub> ] | 1.33                        | 1.10  | 0.67      | 2                          | 2     | 1.55      |

### Comparison between proximal and conventional radial distribution function for water:

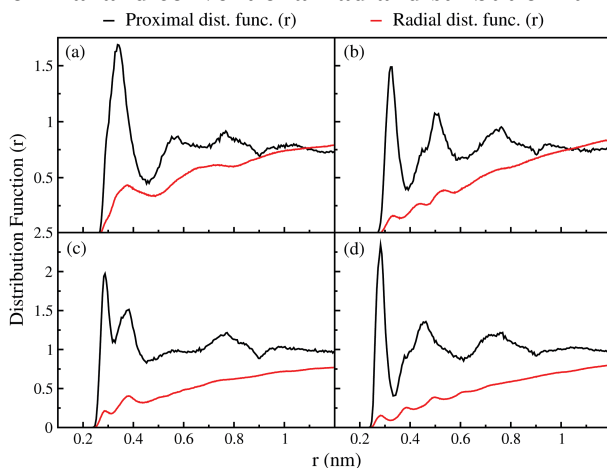

**Figure S5.** Comparison between proximal radial distribution function (black line) and conventional radial distribution function (red line) between major groove and water oxygen (a and c) and minor groove and water oxygen (b and d) for AT-DNA (a and b) and CG-DNA (c and d). The plots indicate the presence of peaks at similar distances from the site for both proximal and conventional radial distribution function with different peak heights.

**Table S2.** The coefficients, time scales and the fitting parameters for MRT calculation of IL cations.

| IL solution              | DNA  | Site | C <sub>1</sub> (%) | $\tau_1$ (ns) | C <sub>2</sub> (%) | $\tau_2$ (ns)      | Correlation coefficient | $\chi^2$ |
|--------------------------|------|------|--------------------|---------------|--------------------|--------------------|-------------------------|----------|
| [BMIM][Cl]               | AATT | Maj  | 91.2               | 1.79          | 8.8                | 59.06              | 0.99                    | 3.57     |
|                          |      | Min  | 88.3               | 1.67          | 11.7               | 57.5               | 0.99                    | 5.02     |
|                          |      | Phs  | 90.2               | 1.37          | 9.8                | 60.35              | 0.99                    | 3.25     |
|                          | CGCG | Maj  | 85.2               | 10.16         | 14.8               | 463.23             | 0.99                    | 7.99     |
|                          |      | Min  | 79.3               | 9.8           | 20.7               | 207.82             | 0.99                    | 2.24     |
|                          |      | Phs  | 73.8               | 7.09          | 26.2               | 76.69              | 0.99                    | 1.12     |
| [Choline][Cl]            | AATT | Maj  | 22.6               | 2.49          | 77.4               | 22.34              | 0.99                    | 0.89     |
|                          |      | Min  | 12.1               | 2.06          | 87.9               | 22.74              | 0.99                    | 1.97     |
|                          |      | Phs  | 40.9               | 1.17          | 59.1               | 21.92              | 0.99                    | 0.47     |
|                          | CGCG | Maj  | 85.1               | 15.32         | 14.9               | $1.56 \times 10^5$ | 0.99                    | 27.19    |
|                          |      | Min  | 81.8               | 16.14         | 18.2               | $1.1 \times 10^5$  | 0.99                    | 34.52    |
|                          |      | Phs  | 75                 | 7.87          | 25                 | 59.58              | 0.99                    | 2.8      |
| [BPYR][Cl]               | AATT | Maj  | 89.9               | 3.16          | 10.1               | 20.22              | 0.99                    | 1.37     |
|                          |      | Min  | 90.3               | 3.89          | 9.7                | 27.43              | 0.99                    | 6.84     |
|                          |      | Phs  | 86                 | 2.65          | 14                 | 24.1               | 0.99                    | 1.23     |
|                          | CGCG | Maj  | 82                 | 7.77          | 18                 | 407.48             | 0.99                    | 6.83     |
|                          |      | Min  | 72.3               | 9.36          | 27.7               | 333.46             | 0.99                    | 11.42    |
|                          |      | Phs  | 79.9               | 5.76          | 20.1               | 282.83             | 0.99                    | 2.99     |
| [BPYR][PF <sub>6</sub> ] | AATT | Maj  | 82.6               | 2.28          | 17.4               | 9.1                | 0.99                    | 0.97     |
|                          |      | Min  | 83.8               | 2.83          | 16.2               | 10.76              | 0.99                    | 3.77     |
|                          |      | Phs  | 80.9               | 1.89          | 19.1               | 11.04              | 0.99                    | 0.9      |
|                          | CGCG | Maj  | 86.9               | 4.04          | 13.1               | 35.18              | 0.99                    | 4.35     |
|                          |      | Min  | 82.3               | 5.00          | 17.7               | 39.29              | 0.99                    | 5.87     |
|                          |      | Phs  | 76.6               | 2.58          | 23.4               | 26.28              | 0.99                    | 3.06     |
| AATT                     | Maj  | 88.6 | 2.21               | 11.4          | 15.33              | 0.99               | 0.54                    |          |
|                          | Min  | 86.6 | 2.52               | 13.4          | 16.77              | 0.99               | 4.41                    |          |
|                          | Phs  | 82.7 | 1.91               | 17.3          | 16.06              | 0.99               | 1.59                    |          |

|                          |      |     |      |      |      |       |      |      |
|--------------------------|------|-----|------|------|------|-------|------|------|
| [BPYR][BF <sub>4</sub> ] | CGCG | Maj | 83.1 | 3.58 | 16.9 | 24.26 | 0.99 | 5.28 |
|                          |      | Min | 79.1 | 4.69 | 20.9 | 28.73 | 0.99 | 7.59 |
|                          |      | Phs | 77   | 2.47 | 23   | 31.93 | 0.99 | 6.78 |

### Error analysis.

To estimate the error in the MRT values, the 100 ns simulation with [BPYR][BF<sub>4</sub>] was divided into two 50ns segments and the C(t) was calculated for 25 ns. The [BPYR][BF<sub>4</sub>] solution was chosen for this since in this case, the correlation function decays rapidly for the IL cation and hence in 25 ns, the C(t) can be expected to reach close to zero. Fitting the data with a bi-exponential function, the timescales have been calculated from which we have calculated the error as:

$$S.D.=\sqrt{((\tau_{100ns}-\tau_{50ns}^1)^2+(\tau_{100ns}-\tau_{50ns}^2)^2)/2.}$$

**Table S3.** The timescales with different segment of trajectory and the error associated with the MRT values of [BPYR]<sup>+</sup> and water.

| Solvent             | Site | MRT (ns) from 100ns ( $\tau_{100ns}$ ) | MRT (ns) from first 50ns ( $\tau_{50ns}^1$ ) | MRT (ns) from last 50ns ( $\tau_{50ns}^2$ ) | S. D. (ns) |
|---------------------|------|----------------------------------------|----------------------------------------------|---------------------------------------------|------------|
| [BPYR] <sup>+</sup> | Maj  | 3.7                                    | 3.77                                         | 3.71                                        | 0.05       |
|                     | Min  | 4.43                                   | 4.91                                         | 4.69                                        | 0.38       |
|                     | Phs  | 4.36                                   | 4.65                                         | 4.49                                        | 0.22       |
| Water               | Maj  | 0.27                                   | 0.27                                         | 0.28                                        | 0.003      |
|                     | Phs  | 0.18                                   | 0.18                                         | 0.19                                        | 0.008      |

**Table S4.** DNA parameters averaged for the middle four base pairs calculated in different IL solutions.

#### (a) Major Groove Width (Å)

| IL solution              | AT-DNA | GC-DNA |
|--------------------------|--------|--------|
| [BMIM][Cl]               | 12.76  | 11.22  |
| [Choline][Cl]            | 11.83  | 11.26  |
| [BPYR][Cl]               | 13.68  | 12.13  |
| [BPYR][PF <sub>6</sub> ] | 12.63  | 12.14  |
| [BPYR][BF <sub>4</sub> ] | 12.43  | 11.82  |

#### (b) Minor Groove Width (Å)

| IL solution   | AT-DNA | GC-DNA |
|---------------|--------|--------|
| [BMIM][Cl]    | 5.94   | 6.7    |
| [Choline][Cl] | 6.53   | 7.13   |
| [BPYR][Cl]    | 5.89   | 6.65   |

|                          |      |      |
|--------------------------|------|------|
| [BPYR][PF <sub>6</sub> ] | 5.2  | 6.88 |
| [BPYR][BF <sub>4</sub> ] | 4.99 | 6.7  |

(c) Major Groove Depth (Å)

| <b>IL solution</b>       | <b>AT-DNA</b> | <b>GC-DNA</b> |
|--------------------------|---------------|---------------|
| [BMIM][Cl]               | 4.93          | 3.86          |
| [Choline][Cl]            | 5.58          | 4.00          |
| [BPYR][Cl]               | 5.00          | 3.46          |
| [BPYR][PF <sub>6</sub> ] | 4.58          | 4.42          |
| [BPYR][BF <sub>4</sub> ] | 4.81          | 4.00          |

(d) Minor Groove Depth (Å)

| <b>IL solution</b>       | <b>AT-DNA</b> | <b>GC-DNA</b> |
|--------------------------|---------------|---------------|
| [BMIM][Cl]               | 4.93          | 4.96          |
| [Choline][Cl]            | 4.83          | 5.07          |
| [BPYR][Cl]               | 4.92          | 5.48          |
| [BPYR][PF <sub>6</sub> ] | 5.21          | 5.05          |
| [BPYR][BF <sub>4</sub> ] | 5.05          | 5.17          |

(e) Rise (Å)

| <b>IL solution</b>       | <b>AT-DNA</b> | <b>GC-DNA</b> |
|--------------------------|---------------|---------------|
| [BMIM][Cl]               | 3.43          | 3.47          |
| [Choline][Cl]            | 3.45          | 3.33          |
| [BPYR][Cl]               | 3.45          | 3.4           |
| [BPYR][PF <sub>6</sub> ] | 3.54          | 3.46          |
| [BPYR][BF <sub>4</sub> ] | 3.52          | 3.41          |

(f) Roll (°)

| <b>IL solution</b>       | <b>AT-DNA</b> | <b>GC-DNA</b> |
|--------------------------|---------------|---------------|
| [BMIM][Cl]               | 1.94          | 2.45          |
| [Choline][Cl]            | 2.95          | 3.4           |
| [BPYR][Cl]               | 0.1           | 1.99          |
| [BPYR][PF <sub>6</sub> ] | -0.06         | 1.47          |
| [BPYR][BF <sub>4</sub> ] | 0.1           | 3.3           |

(g) Tilt (°)

| <b>IL solution</b>       | <b>AT-DNA</b> | <b>GC-DNA</b> |
|--------------------------|---------------|---------------|
| [BMIM][Cl]               | 0.92          | -0.77         |
| [Choline][Cl]            | -0.51         | 0.51          |
| [BPYR][Cl]               | -0.19         | 1.46          |
| [BPYR][PF <sub>6</sub> ] | 0.22          | -1.63         |
| [BPYR][BF <sub>4</sub> ] | -0.86         | 0.4           |

(h) Twist (°)

| <b>IL solution</b>       | <b>AT-DNA</b> | <b>GC-DNA</b> |
|--------------------------|---------------|---------------|
| [BMIM][Cl]               | 33.29         | 36.11         |
| [Choline][Cl]            | 33.36         | 32.47         |
| [BPYR][Cl]               | 33.31         | 33.87         |
| [BPYR][PF <sub>6</sub> ] | 33.17         | 33.38         |
| [BPYR][BF <sub>4</sub> ] | 34.57         | 33.41         |

(i) Slide (Å)

| <b>IL solution</b>       | <b>AT-DNA</b> | <b>GC-DNA</b> |
|--------------------------|---------------|---------------|
| [BMIM][Cl]               | -0.19         | 0.34          |
| [Choline][Cl]            | -0.34         | 0.43          |
| [BPYR][Cl]               | -0.52         | 0.32          |
| [BPYR][PF <sub>6</sub> ] | -0.42         | -0.07         |

|                          |       |      |
|--------------------------|-------|------|
| [BPYR][BF <sub>4</sub> ] | -0.29 | 0.15 |
|--------------------------|-------|------|

(j) Shift (Å)

| IL solution              | AT-DNA | GC-DNA |
|--------------------------|--------|--------|
| [BMIM][Cl]               | 0.22   | -0.11  |
| [Choline][Cl]            | -0.14  | 0.28   |
| [BPYR][Cl]               | -0.13  | 0.26   |
| [BPYR][PF <sub>6</sub> ] | 0.00   | -0.24  |
| [BPYR][BF <sub>4</sub> ] | 0.01   | 0.01   |

**RDF and PMF plot for water near phosphate atoms in different IL solutions.**

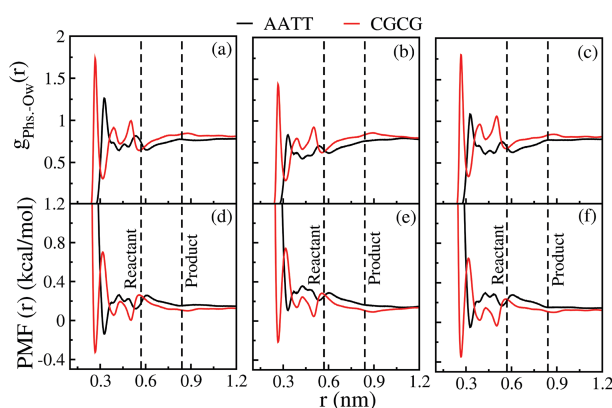

**Figure S6.** The RDF (top panel) and PMF (bottom panel) plots for the phosphate atoms of the DNAs with water oxygen in [BMIM][Cl] solution (a and d), [Choline][Cl] solution (b and e) and [BPYR][Cl] solution (c and f), respectively.

**RDF plots between water and minor groove atom in [BMIM][Cl] and [Choline][Cl] solution.**

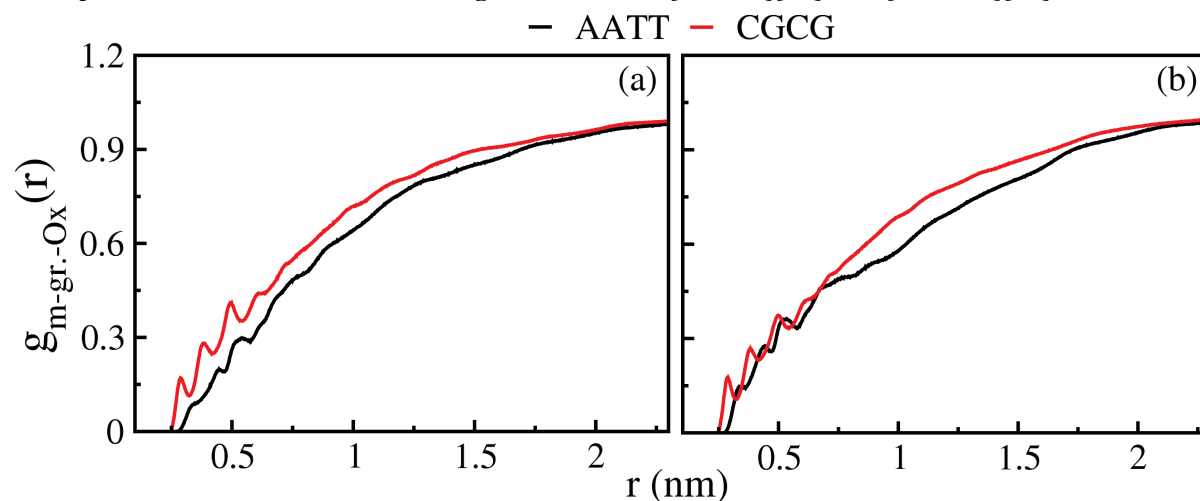

**Figure S7.** The RDF plot between minor groove atoms of AT and CG-DNA with water oxygen atoms in [BMIM][Cl] solution (a) and [Choline][Cl] solution (b).

**Table S5.** The MRT calculation results for water in different IL solutions. Sites containing major groove atoms and the phosphate atoms are denoted as Maj, Phs, respectively.

| IL solution              | DNA  | Site | C <sub>1</sub> (%) | $\tau_1$ (ns) | C <sub>2</sub> (%) | $\tau_2$ (ns) | Correlation coefficient | $\chi^2$ |
|--------------------------|------|------|--------------------|---------------|--------------------|---------------|-------------------------|----------|
| [BMIM][Cl]               | AATT | Maj  | 89.3               | 0.15          | 10.7               | 0.84          | 0.99                    | 0.06     |
|                          |      | Phs  | 91.8               | 0.08          | 8.2                | 0.57          | 0.99                    | 0.06     |
|                          | CGCG | Maj  | 88.4               | 0.91          | 11.6               | 6.55          | 0.99                    | 0.19     |
|                          |      | Phs  | 23.3               | 2.15          | 76.7               | 0.42          | 0.99                    | 0.31     |
| [Choline][Cl]            | AATT | Maj  | 82.0               | 0.21          | 18                 | 0.83          | 0.99                    | 0.08     |
|                          |      | Phs  | 21.6               | 0.54          | 78.4               | 0.08          | 0.99                    | 0.19     |
|                          | CGCG | Maj  | 95.1               | 0.91          | 4.9                | 14.74         | 0.99                    | 0.23     |
|                          |      | Phs  | 75.9               | 0.42          | 24.14              | 1.89          | 0.99                    | 0.28     |
| [BPYR][Cl]               | AATT | Maj  | 86.8               | 0.16          | 13.2               | 0.71          | 0.99                    | 0.04     |
|                          |      | Phs  | 84.5               | 0.08          | 15.5               | 0.47          | 0.99                    | 0.09     |
|                          | CGCG | Maj  | 88.5               | 0.77          | 11.5               | 3.96          | 0.99                    | 0.25     |
|                          |      | Phs  | 80.3               | 0.36          | 19.7               | 1.79          | 0.99                    | 0.21     |
| [BPYR][PF <sub>6</sub> ] | AATT | Maj  | 92.1               | 0.14          | 7.9                | 0.73          | 0.99                    | 0.05     |
|                          |      | Phs  | 84.1               | 0.06          | 15.9               | 0.35          | 0.99                    | 0.07     |
|                          | CGCG | Maj  | 100                | 0.46          | 0                  | 0             | 0.99                    | 1.84     |
|                          |      | Phs  | 80.1               | 0.18          | 19.9               | 0.73          | 0.99                    | 0.09     |
| [BPYR][BF <sub>4</sub> ] | AATT | Maj  | 93.6               | 0.15          | 6.4                | 2.06          | 0.99                    | 0.16     |
|                          |      | Phs  | 92.4               | 0.08          | 7.6                | 1.4           | 0.99                    | 0.37     |
|                          | CGCG | Maj  | 92.6               | 0.42          | 7.4                | 2.69          | 0.99                    | 0.21     |
|                          |      | Phs  | 87.9               | 0.21          | 12.1               | 1.33          | 0.99                    | 0.21     |

**Table S6.** Time scales obtained from calculation at 25 wt% of [BMIM][Cl] for the two DNA systems.

| DNA    | Solvent     | Site | C <sub>1</sub> (%) | $\tau_1$ (ns) | C <sub>2</sub> (%) | $\tau_2$ (ns) | Total time scale (ns) |
|--------|-------------|------|--------------------|---------------|--------------------|---------------|-----------------------|
| AT-DNA | BMIM cation | Maj  | 82.6               | 0.91          | 17.4               | 7.06          | 1.98                  |
|        |             | Min  | 77.4               | 0.82          | 22.6               | 6.86          | 2.18                  |
|        |             | Phs  | 79.1               | 0.63          | 20.9               | 6.53          | 1.87                  |
|        | Water       | Maj  | 96.4               | 0.09          | 3.6                | 6.28          | 0.11                  |
|        |             | Phs  | 92.2               | 0.04          | 7.8                | 2.51          | 0.06                  |
| GC-DNA | BMIM cation | Maj  | 74                 | 2.06          | 26                 | 10.92         | 4.37                  |
|        |             | Min  | 66.1               | 1.73          | 33.9               | 10.53         | 4.71                  |
|        |             | Phs  | 71.8               | 1.47          | 28.2               | 10.39         | 3.99                  |
|        | Water       | Maj  | 93.4               | 2.32          | 6.6                | 1.29          | 0.30                  |
|        |             | Phs  | 86.2               | 1.13          | 13.8               | 0.59          | 0.18                  |



**Table S7.** Values obtained from calculation of MRTs for poly-AT DNA system in 50 wt% [BMIM][Cl] solution.

| Solvent     | Site | C <sub>1</sub> (%) | $\tau_1$ (ns) | C <sub>2</sub> (%) | $\tau_2$ (ns) | Total time scale (ns) |
|-------------|------|--------------------|---------------|--------------------|---------------|-----------------------|
| BMIM cation | Maj  | 88.4               | 1.47          | 11.6               | 33.98         | 5.23                  |
|             | Min  | 84.7               | 1.31          | 15.3               | 33.6          | 6.25                  |
|             | Phs  | 86.8               | 1.14          | 13.2               | 32.99         | 5.35                  |
| Water       | Maj  | 100                | 0.15          | 0                  | 0             | 0.15                  |
|             | Phs  | 84                 | 0.07          | 16                 | 0.22          | 0.09                  |

**Interaction energies between different sites in DNA and water from simulation at 0% IL.**

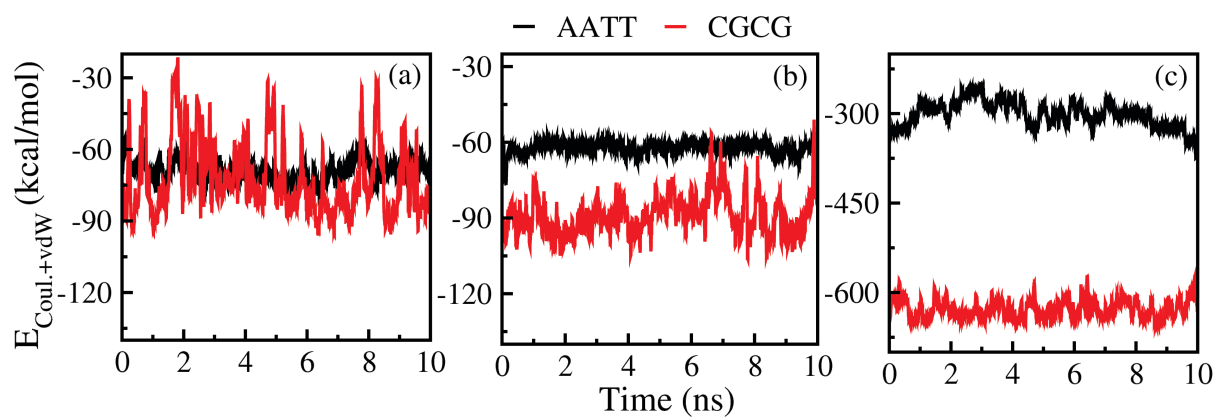

**Figure S8.** The interaction energies between water and major groove (a), minor groove (b) and phosphate group (c) of the DNAs simulated in pure water.

**Table S8.** The number of water near different sites and box volume for the two DNA systems in pure water.

| Site         | Number of water molecules |      | Box volume (nm <sup>3</sup> ) |      |
|--------------|---------------------------|------|-------------------------------|------|
|              | AATT                      | CGCG | AATT                          | CGCG |
| Major groove | 259                       | 326  | 398                           | 301  |
| Minor groove | 237                       | 314  |                               |      |
| Phosphate    | 537                       | 714  |                               |      |
